# Supplementary material for: Estimation of OH in urban plume using TROPOMI inferred NO 2 / CO
Source: Copernicus journal article supplement (doi:10.5194/egusphere-2022-278), 2022-05-13
Supplement: Supplementary file [file egusphere-2022-278-AC1-supplement.pdf]

## #Reviewer 1: Estimation of OH in an urban plume using TROPOMI derived NO<sub>2</sub>/CO "

For presentation quality, I usually try to stay away from commenting on writing style, but I do think some re-organization would be beneficial to the reader. Instances that could help clarify confusion are noted under "Specific comments," but I might also suggest reframing the results in an "easier to digest" way. Currently, Section 3 follows the steps of the analysis quite closely, which gets quite overwhelming when discussing model vs. TROPOMI differences, then ratio optimization vs component wise differences and those differences vs. CAMS or EDGAR, then those differences vs. EMG, etc., each with an emissions, a background, and an OH component. Perhaps an easier to follow organization would first discuss emissions only, in terms of the evolution of the emissions over the course of the optimization, then OH, then background? This is only a suggestion, but I think it would improve the readability of the paper.

### *Author Response:*

*Thank you for your time and suggestions, particularly concerning the structure of the paper. To clarify the structure, Section 3 has been divided into the following subsections*

#### *3.3 WRF optimization using synthetic data*

*3.4 WRF optimization using seasonally averaged TROPOMI data : Here, the ratio and component wise optimizations for summer are explained and compared. First we discuss emissions, followed by OH and background. Prior and optimized estimates are summarized in Table 2 to provide an easy overview of results.*

#### *3.5 WRF optimization using a single TROPOMI overpass*

#### *3.6 WRF optimization Vs the EMG method*

#### *3.7 WRF optimized emissions and emission trends*

*Table S4 has been added, summarizing the results of ratio and component wise optimizations for easy comparison.*

In terms of providing more context/motivation for this work, I would interested in seeing discussion on topics such as: how difficult would it be to apply this method to other cities? What are the limitations that might make this hard to do for some locations? How do these findings influence our understanding of urban pollution, or what role could they play in better quantifying emissions? Etc.

### *Author Response :*

*The following sentence (line 482 to 485) has been added to the discussion section: " The TROPOMI retrieved XNO<sub>2</sub>/XCO ratio is useful for estimating mid-day OH over isolated localized sources, such as the city of Riyadh, showing a clear contrast between the urban plume and the background. In addition, the method requires local sources with NO<sub>2</sub> and CO emissions that are large enough to be detected by TROPOMI. Especially in European cities with lower CO emission where TROPOMI cannot detect the CO enhancement along with NO<sub>2</sub> this method cannot be applied. For cities at higher latitudes, especially in winter, it becomes more critical to account for the contribution of*

*other pathways of NO<sub>x</sub> loss than OH oxidation. Isolated tropical and subtropical cities are therefore best suited for application of our current method. "*

#### Specific comments

L19: From the one-sentence description of the method in the abstract (that OH concentration, NO<sub>x</sub> and CO emissions are iteratively optimized), the referencing to "NO<sub>2</sub>/CO ratio optimization" and "XNO<sub>2</sub> optimization" is unclear without having read the full paper. I would suggest clarifying further the concept of ratio and component-wise optimization. Also, aren't background conditions also optimized? This could be included in the method description.

#### *Author Response:*

*The following sentence has been added (line 24 to 26): "The differences between model and TROPOMI are used to optimize the OH concentration, NO<sub>x</sub>, CO emissions and their background iteratively using a least squares method. To estimate OH, WRF is optimized in two different ways using a) TROPOMI NO<sub>2</sub>/CO ratio to optimize the XNO<sub>2</sub>/XCO ratio in WRF b) TROPOMI derived XNO<sub>2</sub> and XCO to optimize WRF XNO<sub>2</sub> and XCO separately."*

*The optimization about the background conditions is provided in the method section.*

L20: Again, on first reading of the abstract, the mention of CAMS comes as a surprise; I thought WRF was being used. Further elaboration on the method could help clarify.

#### Author Response :

*The following has been added (line 15 to 18): "This study uses passive tracer transport in WRF-CHEM, , instead of the encoded chemistry in combination with auxiliary input variables such as Copernicus Atmospheric Monitoring Service (CAMS) OH , Emission Database for Global Atmospheric Research v4.3.2 (EDGAR) NO<sub>x</sub> , CO emissions and National Center for Environmental Protection (NCEP) based meteorological data. The CAMS based boundary condition for NO<sub>2</sub> and CO are considered as the representative background within the domain"*

L30: Air pollution from cities doesn't just threaten the health of those living in the cities, but also populations downwind; this statement seems overly general.

#### Author Response

*The sentence has been modified to "The associated rise in consumption of energy and materials leads to severe air pollution that is estimated to have caused premature death of 4 to 9 million people globally in 2015 (Sicard et al., 2021; Pascal et al., 2013; Burnett et al., 2018)."*

L82: Please provide the months used in Fig. S1 (i.e., is summer the average of June-July-Aug?)

#### Author Response :

*- Changed as suggested*

L100: I believe the newer v.2.2.0 of the retrieval should help with the bias in NO<sub>2</sub> seen in the analysis, according to the statement here: <http://www.tropomi.eu/data-products/nitrogen-dioxide>. Is it feasible to try this analysis with the newer products? It is understandable that results

cannot always be published immediately after they are produced, but if an update to the analysis cannot be undertaken, at least a discussion of how the analysis might be affected by newer data products or a suggestion for future directions should be included.

**Author Response :**

*The updated v.2.3.1 NO<sub>2</sub> data differ by 7.5 % to 10 % in summer and 13.5 to 16 % in winter compared to AMF re-calculated data. These differences are accounted for in the uncertainty calculation. This sentence has been added to Line 115: “The S5P-PAL reprocessed NO<sub>2</sub> data version 2.3.1 available at <https://data-portal.s5p-pal.com/products/no2.html> differs by 7.5% to 10 % in summer (June to October, 2018) and 13.5 % to 16 % in winter (November, 2018 to March, 2019) compared to the bias corrected TROPOMI NO<sub>2</sub> data used in this study. These differences have been used to quantify the systematic uncertainty of the NO<sub>2</sub> data and its contribution to the uncertainty in the NO<sub>x</sub> emission and lifetime derived using our method (see Table S1 and S2). “*

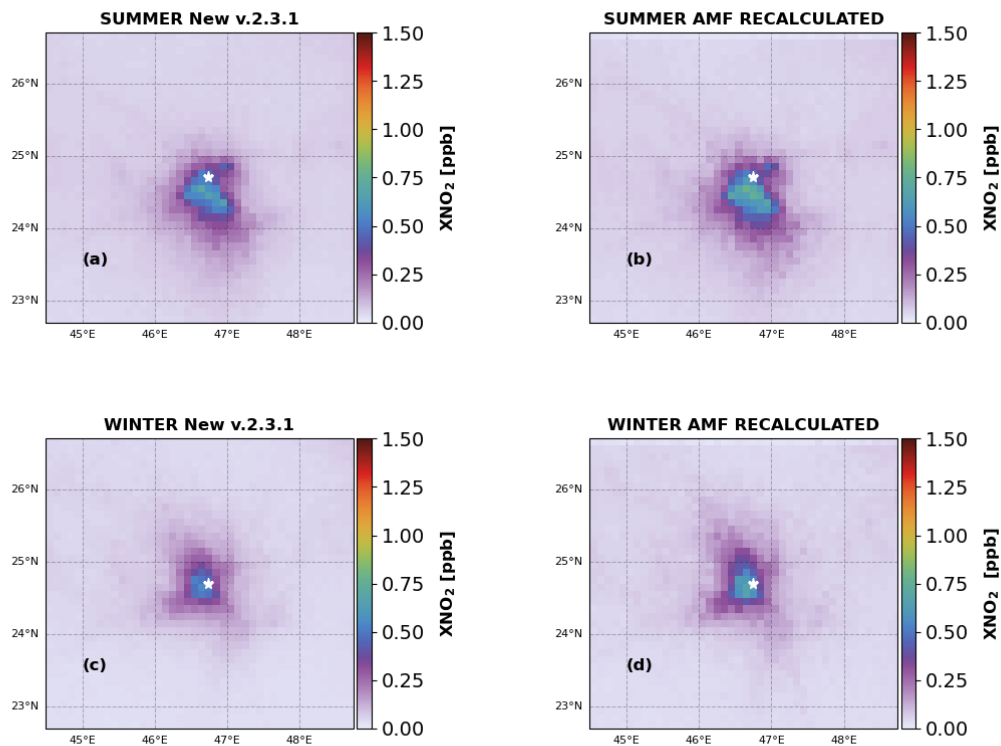

Figure R1. Comparison of TROPOMI derived XNO<sub>2</sub> v2.3.1 Vs bias corrected XNO<sub>2</sub> using AMF recalculation for summer (top) and winter (bottom) over Riyadh.

**L102:** I'd be curious if the WRF-chem model does a better job of simulating urban NO<sub>2</sub>, in general, compared against TM5? So, is it fixing the bias issue for the right reasons?

**Author Response:**

*WRF-Chem model resolves the gradients in NO<sub>2</sub> between urban and downwind regions, whereas TM5-MP smooths out such gradients at 1 deg x 1 deg resolution. Therefore, recalculating the AMF with WRF-Chem corrects for the underestimations in retrieved urban NO<sub>2</sub> columns and the overestimation over downwind regions which is incorporated in many studies (e.g. Huijnen et al., 2010; Visser et al., 2019; Douros et al., 2022).*

**L111:** The authors assessed NO<sub>2</sub> data quality vs ground-based measurements from prior studies; is there a similar analysis that can be done for CO? Or is there reason to believe that the reference CO profile from TM5 is more reliable than it was for NO<sub>2</sub>?

**Author Response:**

*CO has the longer lifetime and background is much more important than for NO<sub>2</sub> which the low resolution model used for deriving prior can adequately resolve. Sha et al.,(2021) compared the TROPOMI derived XCO to the 28 different TCCON ground based station and concluded that average difference between TCCON and TROPOMI is in the range of 9.1 ± 3.3 % . Such difference is used to calculate the uncertainty (see Table S1 and S2).*

In Table 1, the term “XNO<sub>2</sub>(emis,OH)” is used in its own definition; I expecte it was intended to say “As XNO<sub>2</sub>(emis)...” – please check.

**Author Response:**

*Changed as suggested*

**L181:** I’m not sure I agree with this justification for not allowing XNO<sub>x,Bg</sub> to be lost by OH; NO<sub>x</sub> will continue to be oxidized, even if the plume it resides in was previously exposed to OH. Is there any sort of sensitivity test that can be done to see how large an effect this would have on the results?

**Author Response:**

*The comparison of background NO<sub>x</sub> in WRF and CAMS shows differences within 10 % to 20 % for summer and winter confirming that the chemical sources and sinks in background NO<sub>x</sub> are in approximate balance. The application of OH to the NO<sub>x</sub> background results in much smaller background NO<sub>x</sub> concentrations (50 % to 70 %) in WRF than in CAMS.*

*The sensitivity test performed for the summer and winter case in which the XNO<sub>x,Bg</sub> is lost by OH. The scaling factor for summer and winter NO<sub>x</sub> emission is lower by 18 % and 6% compared to the case using background without the OH effect. The optimized emission and OH for summer and winter obtained using XNO<sub>x,Bg</sub> with OH loss differs by less than 7 % compare to the case where background is treated as inert tracer (see Table R1).*

**Table R1.** Overview of WRF optimized OH and NO<sub>x</sub> emissions for Riyadh using NO<sub>x</sub> background with and without the loss by OH.

| Parameters | Summer |                                    |                                 | Winter |                                    |                                 |
|------------|--------|------------------------------------|---------------------------------|--------|------------------------------------|---------------------------------|
|            | Prior  | Optimized using Bg without OH loss | Optimized using Bg with OH loss | Prior  | Optimized using Bg without OH loss | Optimized using Bg with OH loss |
|            |        |                                    |                                 |        |                                    |                                 |

|                                      |     |           |      |      |          |      |
|--------------------------------------|-----|-----------|------|------|----------|------|
| NO <sub>x</sub> emission (kg/s)      | 8.2 | 11.6±2.4  | 11.1 | 9.4  | 7.9±1.8  | 8.03 |
| OH (1e7, molecules/cm <sup>3</sup> ) | 1.3 | 1.7 ± 0.2 | 1.67 | 0.86 | 1.3±0.14 | 1.22 |

L194: Please explain why the lifetime of NO<sub>x</sub> is the more relevant quantity to this analysis than the lifetime of NO<sub>2</sub>.

Author Response :

*This sentence has been added at Line 211 " The components of NO<sub>x</sub> (NO and NO<sub>2</sub>) have short lifetimes during daytime because of the photo stationary equilibrium exchanging NO and NO<sub>2</sub> into each other. For this reason, we estimate the lifetime of their sum (NO<sub>x</sub>) which is determined largely by the reaction with OH. "*

Figure 1 caption: Please indicate "(right)" to describe the right panel, presumably after "wind direction" or "boundary layer."

Author Response:

- *Changed as suggested*

L248: Is it possible that the NO<sub>x</sub>/NO<sub>2</sub> conversion factor may not hold for emissions, since all NO<sub>x</sub> emissions from combustion processes occur in the form of NO, strictly speaking? While NO converts relatively rapidly to NO<sub>2</sub>, this still might be something to consider. Please discuss any anticipated implications of this assumption.

Author Response:

*It's true that most of the NO<sub>x</sub> emission from combustion processes occurs in the form of NO. But in our case, we are looking at a much coarser resolution of 3 km x 3km, where the NO has largely been converted into NO<sub>2</sub> due to the fast photo-stationary equilibrium. Therefore, the NO<sub>x</sub>/NO<sub>2</sub> conversion factor, reflecting this equilibrium, is the best way to quantify the emitted amount of reactive nitrogen given the satellite observed amount of NO<sub>2</sub>. The conversion factor is derived from CAMS and varies temporally and spatially within the domain.*

Fig. 4c: It seems very counterintuitive that the optimization for XCO increases emis by so much, barely decreases Bg, yet you still achieve a decline in the XCO quantities such that TROPOMI values are well matched. Am I interpreting this correctly?

Author Response:

*The CO background is much larger than the enhancement due to city emissions. Therefore, the small fractional reduction in the background has a larger impact on the XCO level than the emission increase.*

Fig. 4 caption: How exactly are the f values shown here derived? It looks as though they are not simply the sum of f\_1 and f\_2 values shown in Fig. S17. Please either explain or point to the location in the text where this is explained.

Author Response:

*This section has been added in the supplementary:*

*Text S5. Iterative scaling factor optimization*

*Step 1: Scaling factors  $f_{OH1}$ ,  $f_{emis1}$  and  $f_{Bg1}$  (for OH, emissions and background levels) are derived from least squares optimization of WRF using a priori settings to TROPOMI.*

*Step 2: WRF is run with optimized inputs from Step 1 to derive WRF Ratio<sub>1st iter</sub>,  $XNO_2$ <sub>1st iter</sub> and  $XCO$ <sub>WRF, 1st iter</sub>.*

*Step 3:  $f_{OH2}$ ,  $f_{emis2}$  and  $f_{Bg2}$  are derived as in Step 1 using the results from Step 2.*

*Step 4: Step 2 is repeated for  $f_{OH2}$ ,  $f_{emis2}$  and  $f_{Bg2}$  to derive WRF Ratio<sub>opt</sub>,  $XNO_2$ <sub>WRF,opt</sub> and  $XCO$ <sub>WRF, opt</sub>.*

*Step 5: Final optimized scaling factor are derived by multiplying the scaling factor from the 1<sup>st</sup> and 2<sup>nd</sup> iteration.*

L345: I'm concerned that this test is more likely to work since you are dealing with an internally consistent system. Using the model, it is easier to be sure that it can replicate a hypothetical scenario posed in the model with enough adjustments. The real world and what TROPOMI are detecting could be very different systems, though, so if the model is missing underlying processes, there is less confidence that this optimization process is robust.

I suppose the pseudo data experiment is still worth doing, and I'm not sure what test I would suggest in its place, but perhaps some qualification should be added that the promising results of the experiment may stem from this being an ideal/consistent system.

Author Response:

*To obtain a more realistic estimate of the uncertainty in least squares optimization derived OH, TROPOMI data have been replaced by  $NO_2$ , CO and  $NO_2/CO$  ratio derived from WRF-chem using the Carbon Bond Mechanism Z (CBM-Z) gas-phase chemical mechanism (Zaveri and Peters, 1999). EDGAR based VOCs,  $NO_x$  and CO emission have been used in combination with boundary condition for NO,  $NO_2$ , CO, ozone ( $O_3$ ) from CAMS to run WRF-chem for August 17<sup>th</sup>, 2018 and November 18<sup>th</sup>, 2018 representing a summer and winter day, respectively.*

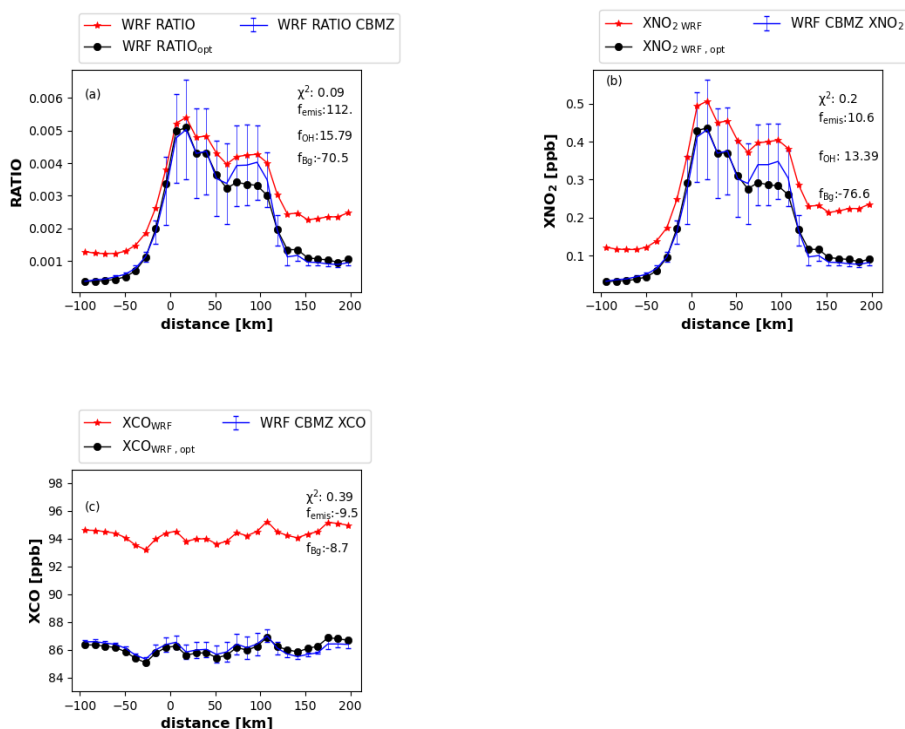

Figure S17. WRF derived a)  $XNO_2/XCO$ , b)  $XNO_2$  and c)  $XCO$  before and after optimization in comparison to WRF using full online chemistry with CBMZ chemical scheme for 17<sup>th</sup> August, 2018.

*For August 17<sup>th</sup>, 2018, the ratio and  $XNO_2$  optimization increase the CAMS based prior OH of  $1.19 \times 10^7$  molecules/cm<sup>3</sup> by 15.7 % and 13.4 %, respectively (see Figure S17). In the WRF-chem full online chemistry simulation the boundary layer averaged OH for the box of 300 km x 100 km amounts to  $1.33 \times 10^7$  molecules/cm<sup>3</sup>, which <5 % lower than the optimized OH value that is derived using our method. The optimized NO<sub>x</sub> and CO emission differs by <11 % than the emission input in full online chemistry.*

*In winter, optimization increases CAMS based OH of  $1.03 \times 10^7$  molecules/cm<sup>3</sup> by 19.4%. The OH derived from WRF-chem full online chemistry is  $1.07 \times 10^7$  molecules/cm<sup>3</sup> and lower by 15.2% than the optimized OH value. The component wise optimization increases the EDGAR NO<sub>x</sub> and CO emissions by 23.1 % and 10.5 %, respectively. Overall, the uncertainty in optimized NO<sub>x</sub>, CO emission and OH derived from this test is <11 % in summer and 10 % to 23 % in winter. Since the lifetime of NO<sub>x</sub> is determined by other reactions in addition to the oxidation to HNO<sub>3</sub> considered in our method, it is expected to overestimate the real OH value. The test using WRF full chemistry confirms that this is indeed the case. The uncertainty for OH, NO<sub>x</sub> emission and CO emission are in good agreement with the CLASS computations explained in detail in Text S6.*

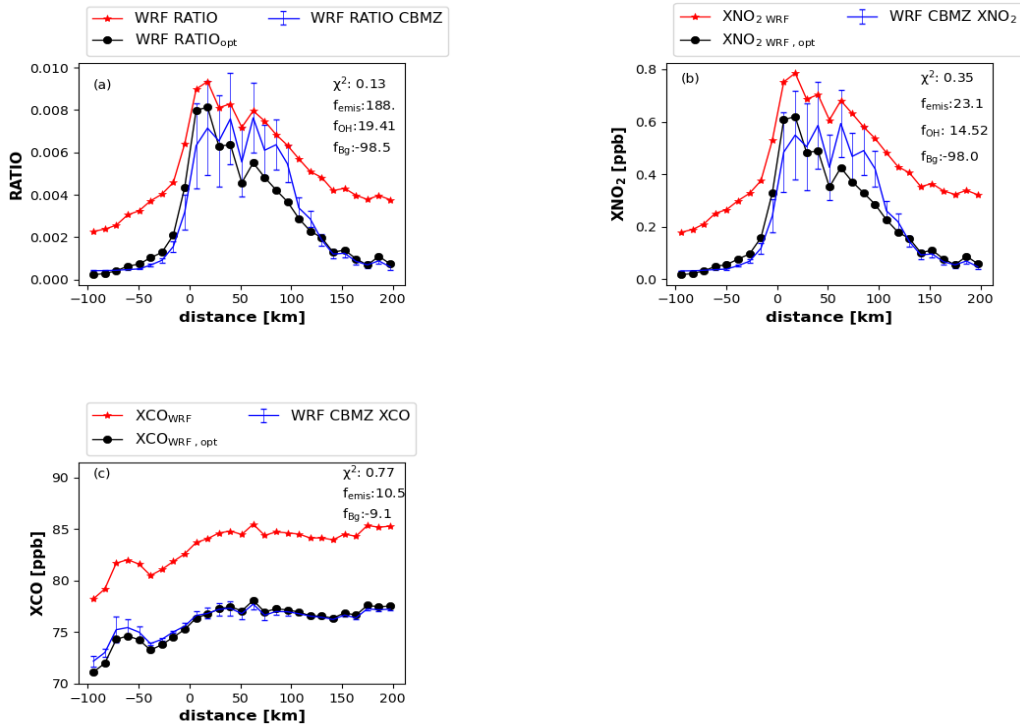

Figure S18. Same as Figure S17 but for 18<sup>th</sup> November, 2018.

L352: I was initially confused that the f values in Figs. S17 and S18 changed so much between the first iteration and the second. I later realized that the second iteration values represented adjustments made to the first iteration values (i.e.,  $f_{emis}$  doesn't go from being +158.5 to -1.3 from iteration 1 to 2 in Fig. S17a; it goes from 158.6 to 157.2, or however you derive the 155.1  $f_{emis}$  in Fig. 4a). It may be worth describing this more fully, so other readers aren't confused.

Author Response:

*As explained above already, section Text S5 has been added describing the iterative optimization method and how optimized scaling factors are derived from it.*

Also, for Fig. S17c, please place the values of  $f_{emis1}$  and  $f_{Bg1}$  on the left side, 2nd iteration  $f$ 's on the right, to avoid confusion. And, why is there not a green line in this panel corresponding to XCO\_WRF,1st iter?

Author Response:

*Changed as suggested.*

*In XCO optimization, the 1<sup>st</sup> iteration process does most of the job. The scaling factors from the second iteration are very close to the 1<sup>st</sup> iteration. Therefore, the green and black lines are on top of each other.*

L371: It would be helpful to state the value from Lama et al. (2020) here.



**Author Response:**

*-Changed as suggested*

**L417:** Looking at Fig. S19, if this is done by linear extrapolation from data that is present for 2000-2015, why does year 2016 CO emissions drop followed by increases in 2017 and 2018?

**Author Response:**

*Thank you for this comment, which pointed to a bug in the linear extrapolation which has been fixed. Here is the new figure:*

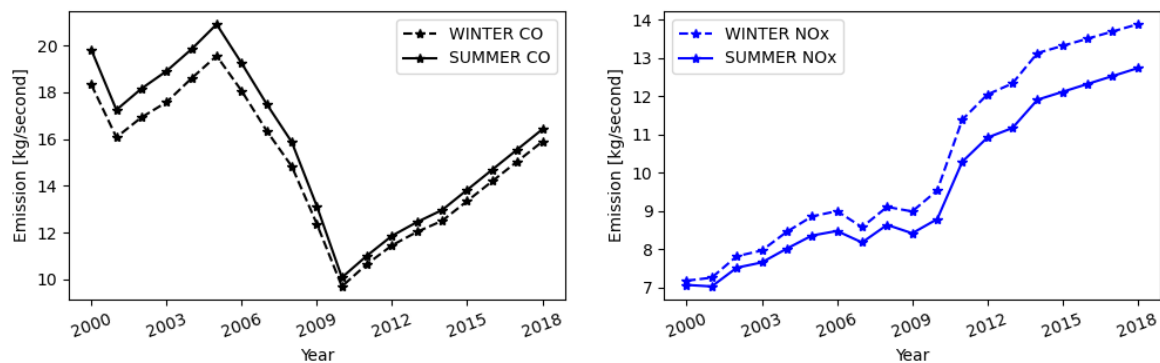

Figure S19. EDGAR a) CO and b) NO<sub>x</sub> emission from 2000 to 2018 for summer and winter at the time TROPOMI overpasses over Riyadh. EDGAR 2000 to 2015 data is linearly extrapolated to derived emission data for 2018.

**L426:** Please state why this model simulation is well suited to evaluate emissions changes – how does it calculate emissions, if not by relying on the EDGAR inventory?

**Author Response:**

*To test the dependency of the method on the EDGAR emission inventory, a sensitivity test is performed reducing the prior emission by factor 10 (see Figure R3). The optimized emission that we get from this simulation is equal to that of the base inversion. This shows that the optimized estimate is independent from the total emission from EDGAR. However, the optimized emission does rely on the spatial emission pattern, which is why we need a priori emissions.*

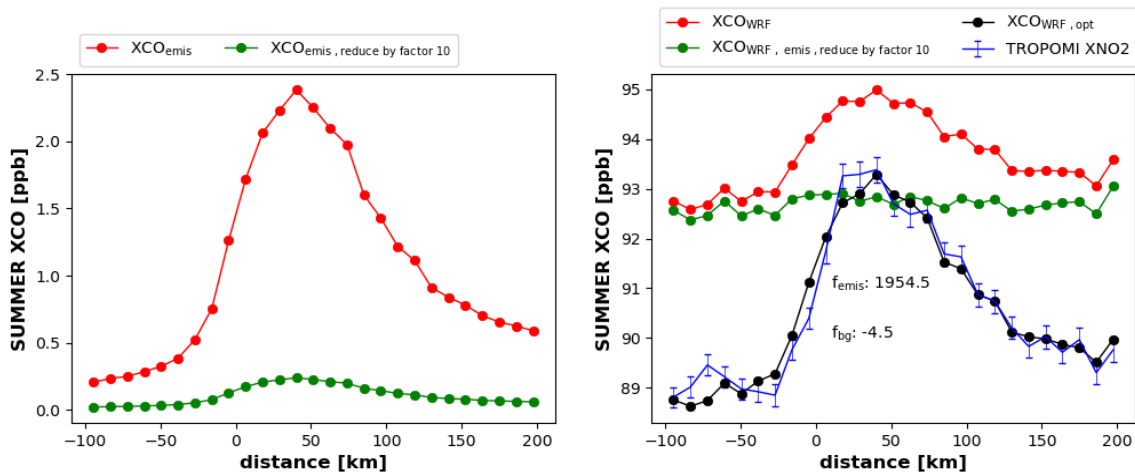

Figure R3. WRF derived  $XCO_{emis}$  before and after reduction by factor 10 (left) is used to derive  $XCO_{WRF}$  ( $XCO_{emis} + XCO_{Bg}$ ) and  $XCO_{WRF, emis}$  reduce by factor 10 ( $XCO_{emis, reduce by factor 10} + XCO_{Bg}$ ) (right). The comparison of TROPOMI derived XCO and  $XCO_{WRF, emis}$  reduce by factor 10 before and after optimization (right). The femis and fbg are the scaling factor for emission and background. The unit is in percentage.

**L447: What is CAMS-TEMPO based on? Is there a reason why its temporal emission factors for Riyadh should be especially trustworthy?**

**Author Response:**

*CAMS-TEMPO is based on statistical information on temporal emission variations per sector collected at the local, regional and national level. This information is used to derive meteorology-dependent parametrizations to understand the dependence on climatological and sociodemographic factors. CAMS-TEMPO is expected to provide a more accurate representation of emission variation due to the information on temporal, spatial variations that is included.*

**L464: Why give a range for summer but a precise value for winter?**

**Author Response:**

*The sentence is added "The WRF derived  $XNO_2/XCO$  ratio is higher by 15 % to 30 % in summer and 40% to 60 % in winter compared to TROPOMI, explained mostly by the difference in  $XNO_2$ ."*

-Changed as suggested

**L470: "Estimates" here means estimates of OH change, correct? Please clarify. (couldn't understand this part)**

**Author Response**

*The sentence is modified in Line 521 as follows "The OH estimates obtained from the ratio and  $NO_2$ -only optimization differ <10 %, demonstrating the robustness of the method."*

**L475: It's not just sources, but also some sinks are missing (for  $NO_2$ ), right? (this is done)**

**Author Response:**

- *Sinks has been added*

L500: Is it possible to give a title to Appendix B, as was done for Appendix A? (this is done)

Author Response:

- *The section is now called: XCO component wise optimization*

L504-505: Why not write this in its simplified form,  $XCO\_emis * 0.10$ ? The same goes for the next line. ( this is done)

Author Response:

- *Changed as suggested*

Technical corrections

L30: “threating” should be “threatening”

- *changed as suggested*

L65: Beginning “OH estimates from...” is not a complete sentence

L107: This URL returns a “Not found” message

- *New URL <https://s5phub.copernicus.eu> has been added*

L175: “save” should be “safe”

- *Changed as suggested*

L310: “emission” repeated twice

- *Changed as suggested*

L313: either “estimates” should be singular or “an” should be removed

- *Changed as suggested*

L355: f\_B should be f\_Bg

- *Changed as suggested*

L392: “a” should be removed, or else “days” should not be plural

- *Changed as suggested*

L397: “compare” should be “compared”

- *Changed as suggested*

L407: “it the solution” should be “at the solution”

- *Changed as suggested*

L419: “yield” should be “yields”

- *Changed as suggested*

L422: “has” should be “have”

- *Changed as suggested*

L481: “allows” should be “allow”

- *Changed as suggested*

L509: Again, the link to the TROPOMI data appears to be invalid.

- *Two links are provided for TROPOMI data which appear to work fine.*

The Zenodo link for the WRF simulations requires a login, so I could not access the data; I’m unsure if this is typical or not.

- *Zenodo doesn’t require a login. The link directs to a folder with WRF files, including a README file with instructions for use.*
